# Supplementary material for: Sea salt emission, transport and influence on size-segregated nitratesimulation: a case study in northwestern Europe by WRF-Chem
Source: Copernicus journal article supplement (doi:10.5194/acp-16-12081-2016), 2016-09-27
Supplement: Supplementary file 1 [file acp-16-12081-2016-supplement.zip]

Archive with 3 entries (3 files):
- datasets of figures.zip
- acp-2016-309-new supplement.pdf
- acp-16-12081-2016-supplement-title-page.pdf
