# Supplementary material for: Sea salt emission, transport and influence on size-segregated nitratesimulation: a case study in northwestern Europe by WRF-Chem
Source: Copernicus journal article supplement (doi:10.5194/acp-16-12081-2016), 2016-09-27
Supplement: Supplementary file 1 [file acp-16-12081-2016-supplement.zip › acp-16-12081-2016-supplement-title-page.pdf]

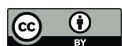

## *Supplement of*

# **Sea salt emission, transport and influence on size-segregated nitrate simulation: a case study in northwestern Europe by WRF-Chem**

**Ying Chen et al.**

*Correspondence to:* Yafang Cheng (yafang.cheng@mpic.de) and Ying Chen (chen@tropos.de)

- [acp-16-12081-2016-supplement-title-page.pdf](#)
- [acp-2016-309-new supplement.pdf](#)
- [datasets of figures.zip](#)

The copyright of individual parts of the supplement might differ from the CC-BY 3.0 licence.
