# Supplementary material for: Sea salt emission, transport and influence on size-segregated nitratesimulation: a case study in northwestern Europe by WRF-Chem
Source: Copernicus journal article supplement (doi:10.5194/acp-16-12081-2016), 2016-09-27
Supplement: Supplementary file 3 [file Permission for reprint 3 Weather map figures on Atmospheric Chemistry and Physics (ACP).pdf › picture data upload/Fig. S3 - Weather Map/Permission for reprint 3 Weather map figures on Atmospheric Chemistry and Physics (ACP).pdf]

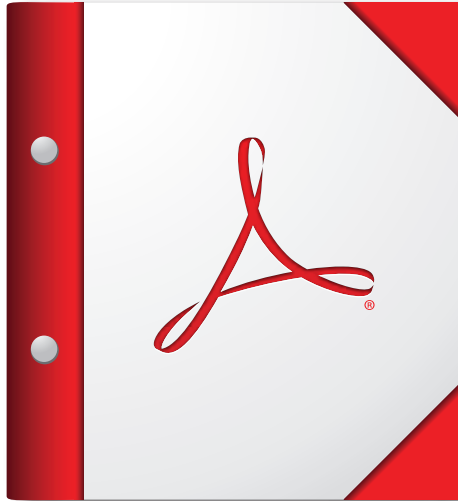

**For the best experience, open this PDF portfolio in  
Acrobat X or Adobe Reader X, or later.**

**Get Adobe Reader Now!**
